# Supplementary material for: The Effect of Low Positive Temperatures on the Formation of Secondary Metabolites in Rhodiola quadrifida (Pall.) Fisch. et C.A. Mey. In Vitro Cultures
Source: MDPI journal article supplement (doi:10.3390/pr11010028), 2022-12-23
Supplement: s1 [file s1]

Supplementary Materials

# The effect of low positive temperatures on the formation of secondary metabolites in *Rhodiola quadrifida* (Pall.) Fisch. et C.A. Mey. *in vitro* cultures

Anna Y. Stepanova <sup>1,\*</sup>, Evgeny A. Gladkov <sup>1, \*</sup>, Dmitry V. Tereshonok <sup>1</sup>, Renat N. Selimov <sup>2</sup>, Elisaveta N. Goncharova <sup>2</sup> and Aleksandra I. Solov'eva <sup>1</sup>

<sup>1</sup> K.A. Timiryazev Institute of Plant Physiology Russian Academy of Sciences, 127276 Moscow, Russia

<sup>2</sup> Bioanalytical laboratory OOO "NVC Agrovetzaschita", Moscow, 129329, Russia

\* Correspondence: Anna Y. Stepanova, step\_ann@mail.ru; Tel.: +7(499) 678-53-97 (A.Y.S.) ;  
Evgeny A. Gladkov, gladkovu@mail.ru

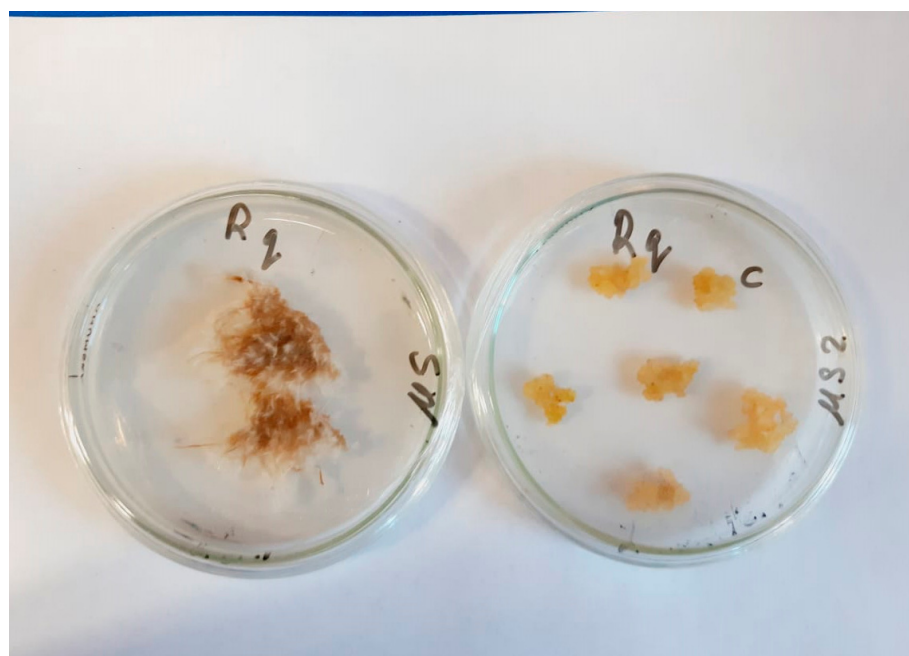

**Figure S1** In vitro cultures of *Rhodiola quadrifida*: hairy roots (left), calli (right)

**Table S1.** Parameters of analytical method.

| Parameter                                         | Salidroside | Rosavin     | Rosarin    | Rosin      | Tyrosol    |
|---------------------------------------------------|-------------|-------------|------------|------------|------------|
| Linear range, ng/ml                               | 1-200       | 1-200       | 1-200      | 1-100      | 1-50       |
| LoD, ng/ml                                        | 0,1         | 0,2         | 0,2        | 0,2        | 0,2        |
| LoQ, ng/ml                                        | 0,3         | 0,5         | 0,6        | 0,7        | 0,8        |
| Recovery ( $\pm$ SD), %                           | 94 $\pm$ 5  | 93 $\pm$ 8  | 87 $\pm$ 9 | 90 $\pm$ 9 | 83 $\pm$ 9 |
| Matrix effect ( $\pm$ SD), %                      | 100 $\pm$ 9 | 94 $\pm$ 10 | 81 $\pm$ 9 | 87 $\pm$ 6 | 75 $\pm$ 6 |
| Within-run precision, low level (1 ng/ml), CV, %  | 10-11       | 6-14        | 4-13       | 9-14       | 7-11       |
| Between-run precision, low level (1 ng/ml), CV, % | 12          | 12          | 12         | 11         | 9          |

|                                                     |      |      |     |       |      |
|-----------------------------------------------------|------|------|-----|-------|------|
| Within-run precision, high level (50 ng/ml), CV, %  | 4-10 | 7-12 | 4-9 | 10-12 | 5-11 |
| Between-run precision, high level (50 ng/ml), CV, % | 9    | 11   | 13  | 14    | 11   |
| Long-term stability at -20 °C, days                 | ≥30  | ≥30  | ≥30 | ≥30   | ≥30  |
| Autosampler stability at 4 °C, h                    | ≥24  | ≥24  | ≥24 | ≥24   | ≥12  |
